# Supplementary material for: Alkali-stable and highly anion conducting poly(phenylene oxide)s carrying quaternary piperidinium cations
Source: Royal Society of Chemistry journal article supplement (doi:10.1039/c6ta01905f), 2016-01-01
Supplement: c6ta01905f1.pdf [file c6ta01905f1.pdf]

## Supporting Information

# Alkali-stable and highly anion conducting poly(phenylene oxide)s carrying quaternary piperidinium cations

Hai-Son Dang and Patric Jannasch\*

Polymer & Materials Chemistry, Department of Chemistry, Lund University

P.O. Box 124, SE-221 00, Lund, Sweden

*E-mail: patric.jannasch@chem.lu.se*

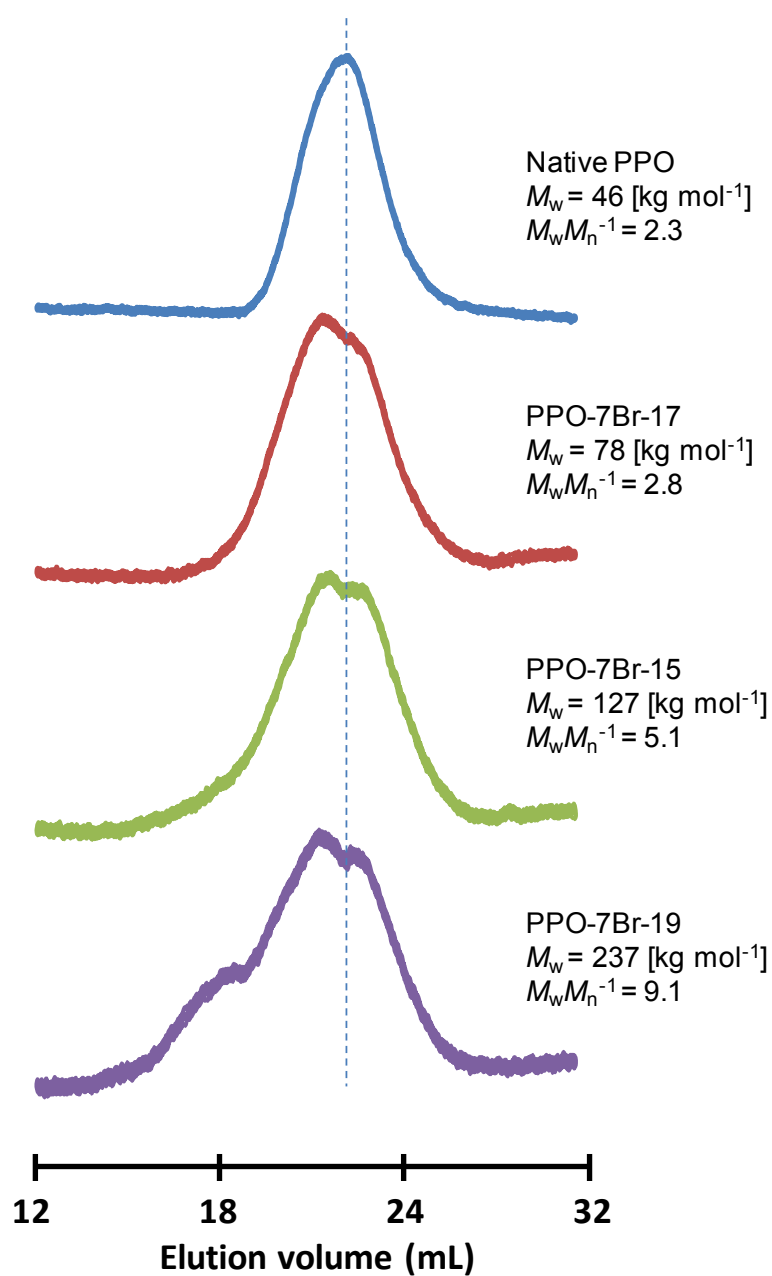

**Figure S1.** Typical SEC traces of native and bromoalkylated PPO, indicating increased  $M_n$  and PDI value by the appearance of high-molecular weight fractions after the bromoalkylation.

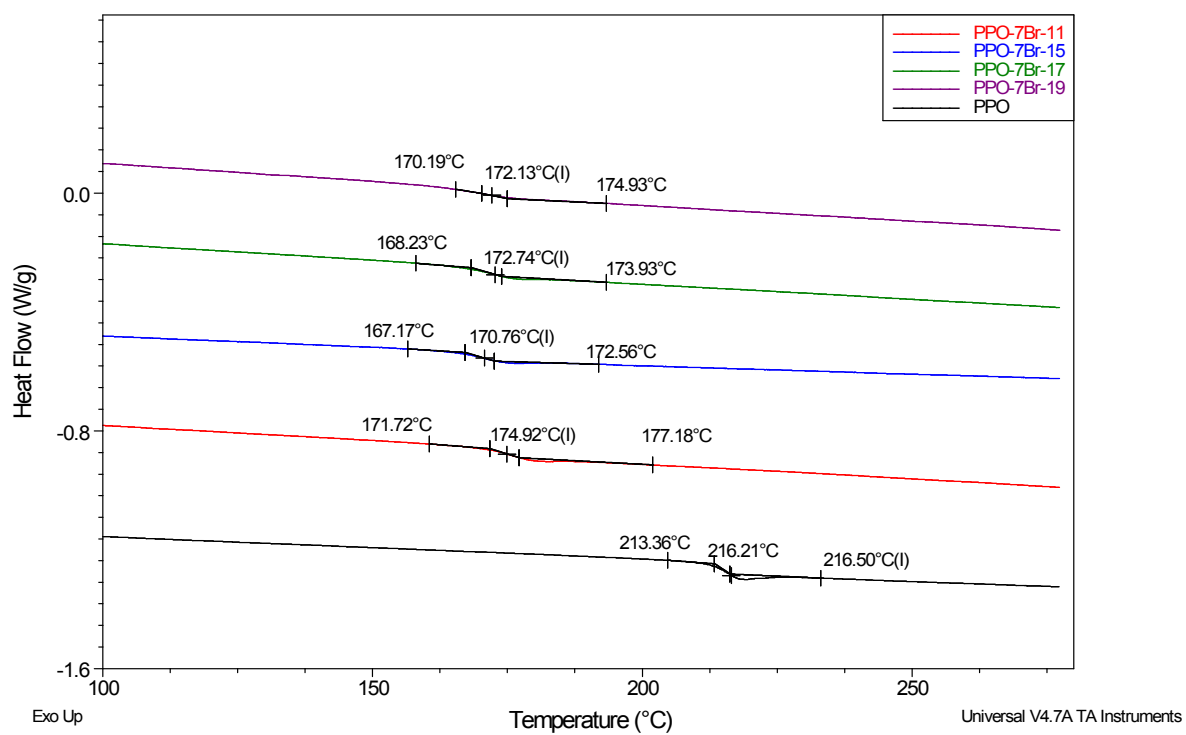

**Figure S2.** DSC heating traces of native and bromoalkylated PPOs (PPO-7Br-DB).

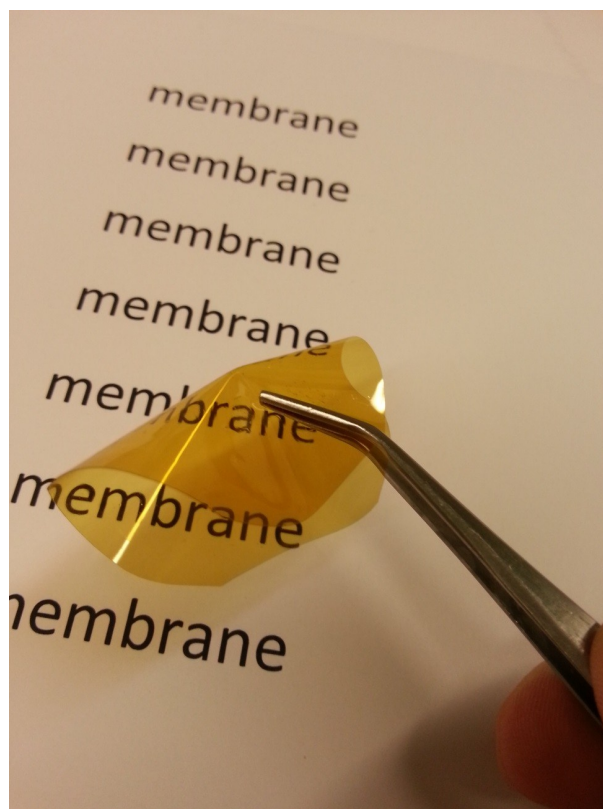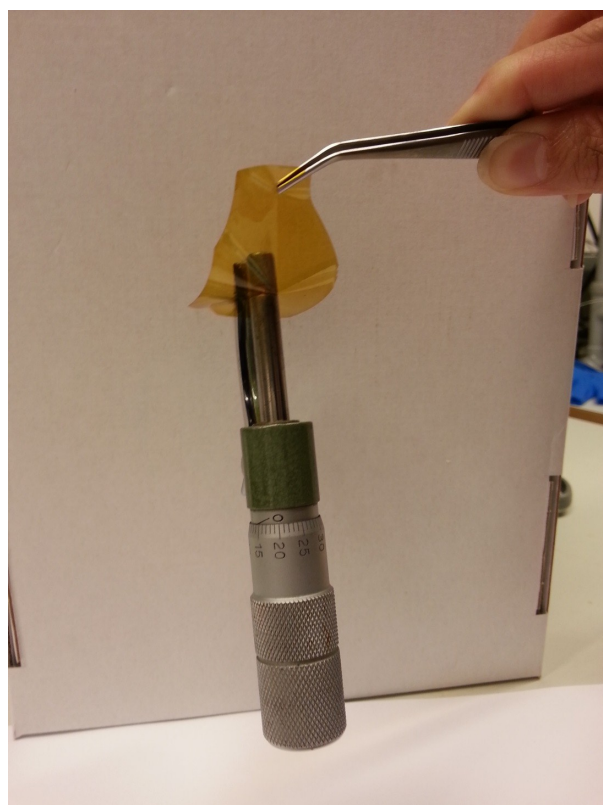

**Figure S3.** Photographs showing membrane PPO-7bisQPi-1.8Br in the 180° folded (upper) and load bearing (lower) state. The weight of the micrometer was 180 g and the membrane was seemingly unaffected after this treatment.

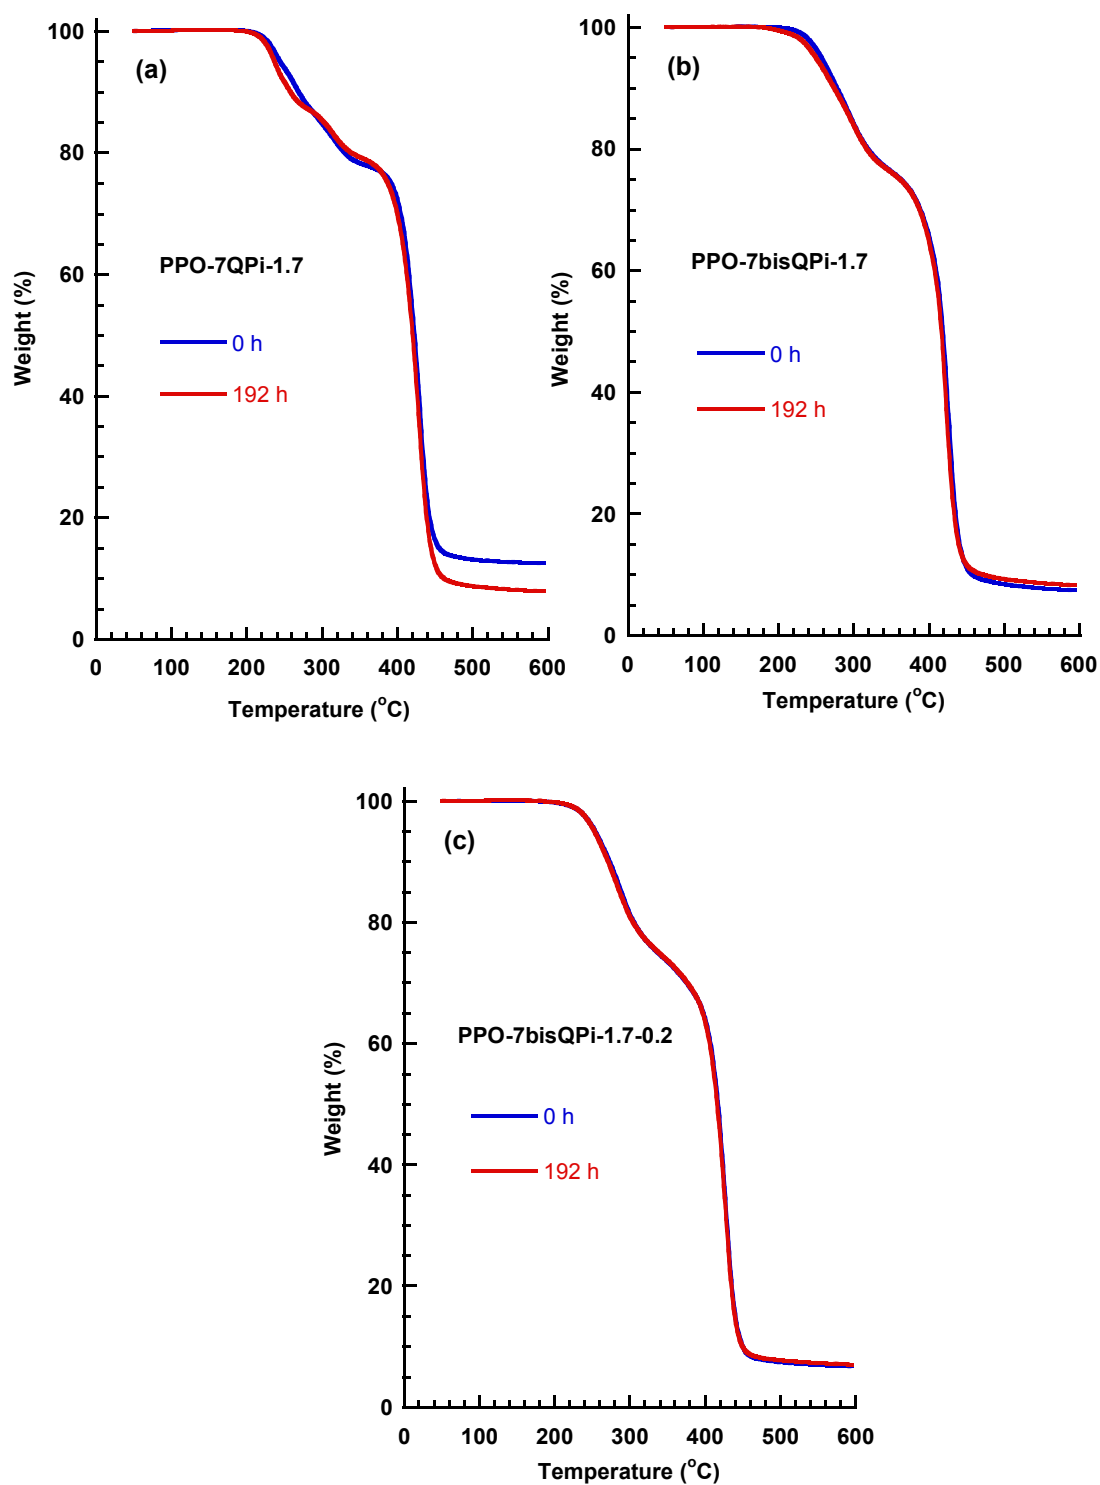

**Figure S4.** TGA traces of AEMs in the Br<sup>-</sup> form before and after the alkaline treatment in 1 M NaOH at 90 °C for 192 h, (a) PPO with mono-QPi functional side chains, (b) PPO with bis-QPi functional side chains, and (c) crosslinked bis-QPi functional PPO (please note the high degree of overlap).

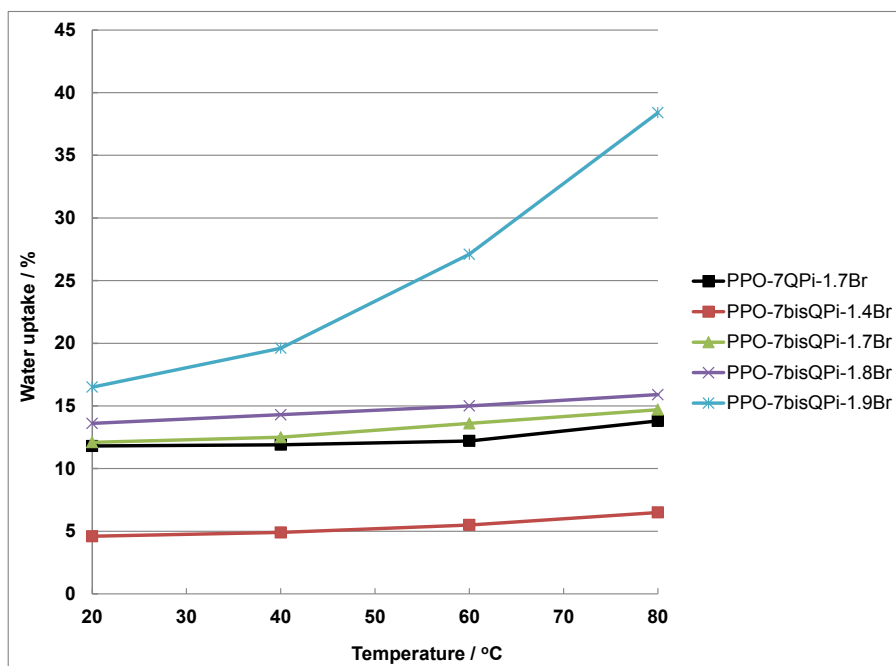

**Figure S5.** Water uptake of the fully hydrated (immersed) AEMs in the  $\text{Br}^-$  form as a function of temperature.

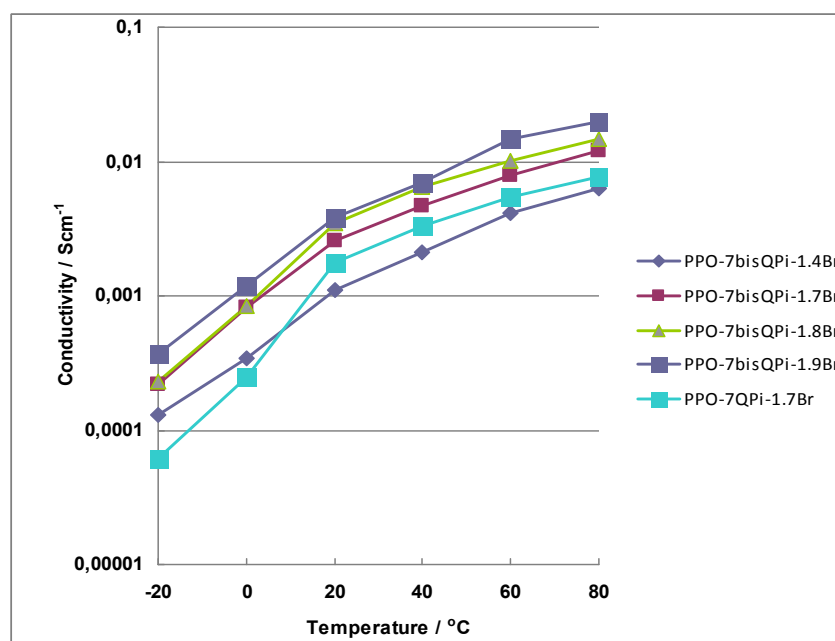

**Figure S6.**  $\text{Br}^-$  conductivity data measured by EIS of mono- and bis-QPi functionalized PPO AEMs under fully hydrated (immersed) conditions.

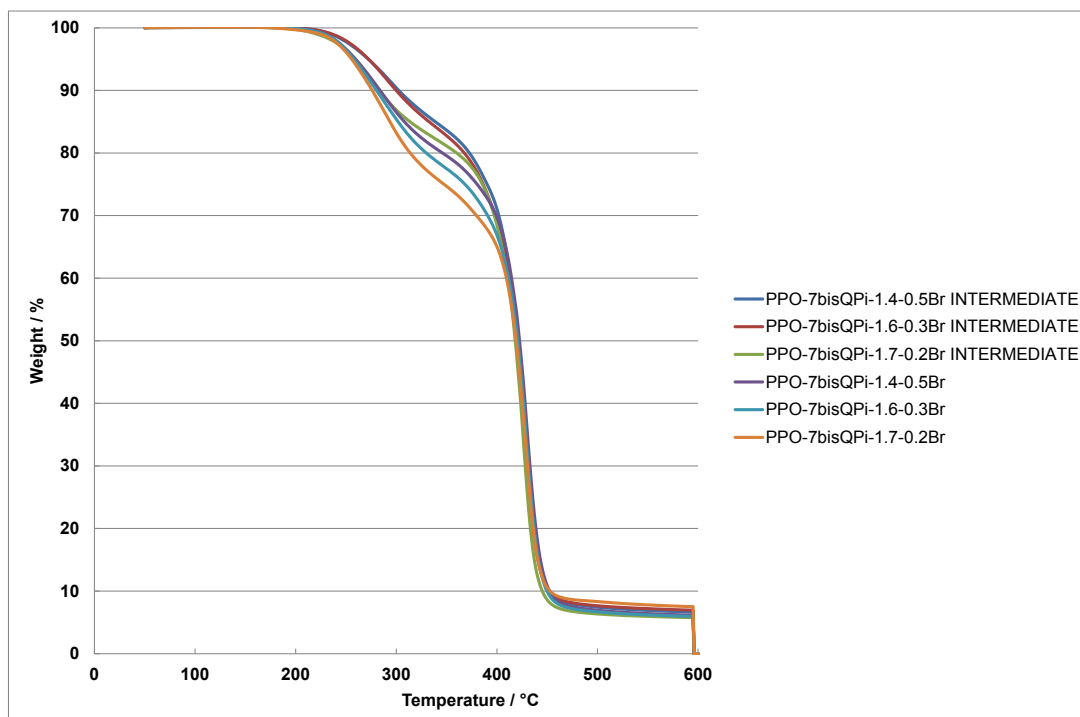

**Figure S7.** TGA traces of crosslinked AEMs based on PPO-7Br-20 after the first step (denoted “intermediate”) and of the final PPO-7QPi-*x*-*y* membranes after the second (final) step. Samples measured under N<sub>2</sub> at 10 °C min<sup>-1</sup> in the Br<sup>-</sup> form.

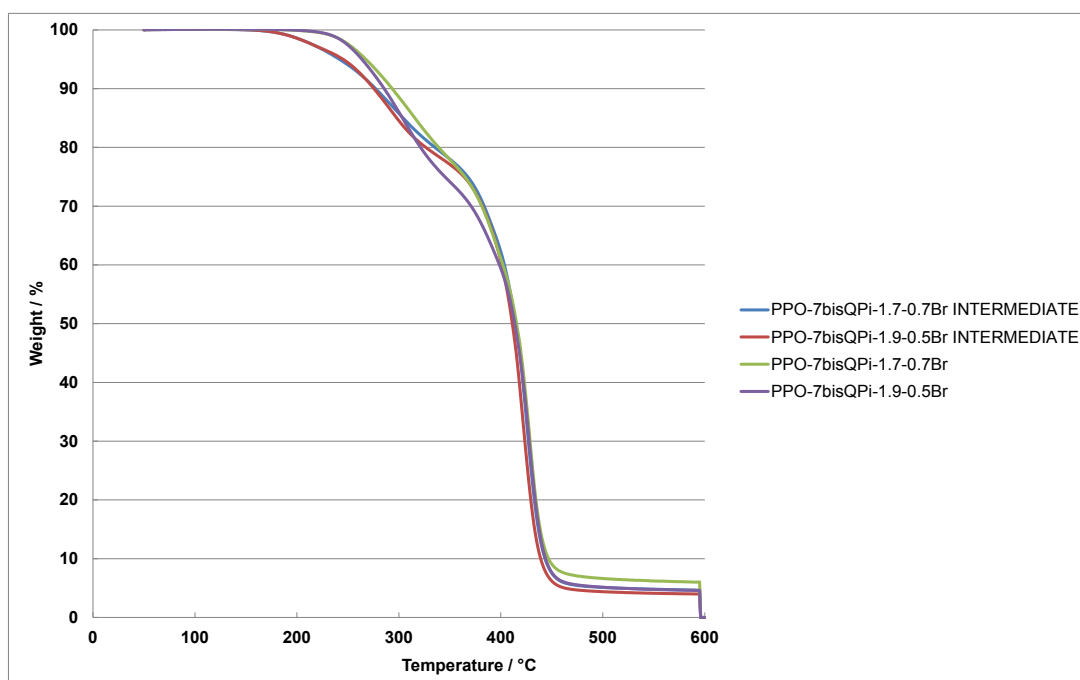

**Figure S8.** TGA traces of crosslinked AEMs based on PPO-7Br-30 after the first step (denoted “intermediate”) and of the final PPO-7QPi-*x*-*y* membranes after the second (final) step. Samples measured under N<sub>2</sub> at 10 °C min<sup>-1</sup> in the Br<sup>-</sup> form.
